# Supplementary material for: Cytogenetic screening of chromosomal abnormalities and genetic analysis of FSH receptor Ala307Thr and Ser680Asn genes in amenorrheic patients
Source: PeerJ journal article supplement (doi:10.7717/peerj.15267), 2023-05-26
Supplement: human_participant_information_sheet.pdf [file human_participant_information_sheet.pdf]

**CYTOGENETIC SCREENING OF CHROMOSOMAL ABNORMALITIES AND GENETIC ANALYSIS OF FSH RECEPTOR ALA307THR AND SER680ASN GENES IN AMENORRHEIC PATIENTS**

---

**Questionnaires :-**

❖ Case number :-  Date :

❖ Name :-  Age :-

▪ Phone number :-

❖ Weight :-  Height :-  BMI :-

❖ WBCs count :-

▪ **Type of amenorrhea :-**

Primary amenorrhea

Secondary amenorrhea

- Absence menstrual cycle for : Three months :  Six months :

▪ Secondary sexual characteristics :

▪ A family history of the age of menarche and menopause of the patient's mother and siblings or PCOs

---

▪ Ultrasonography

Ovaries :- \_\_\_\_\_

Uterus :- \_\_\_\_\_

Endometrium:- \_\_\_\_\_

Cervix :- \_\_\_\_\_

Vagina :- \_\_\_\_\_

▪ MRI :- \_\_\_\_\_

▪ Anosmia :-

▪ **Hormonal assay :-**

FSH  LH  E2  PRL  TSH

Testosterone  AMH
