# Supplementary material for: Cytogenetic screening of chromosomal abnormalities and genetic analysis of FSH receptor Ala307Thr and Ser680Asn genes in amenorrheic patients
Source: PeerJ journal article supplement (doi:10.7717/peerj.15267), 2023-05-26
Supplement: LC739719.pdf [file LC739719.pdf]

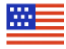

An official website of the United States government

[Here's how you know](#)[Log in](#)Nucleotide [GenBank](#)

## Homo sapiens 5\_Ala307Thr FSHR gene for follicle stimulating hormone receptor, partial sequence

GenBank: LC739719.1

[FASTA](#) [Graphics](#)[Go to:](#)

LOCUS LC739719 507 bp DNA linear PRI 22-NOV-2022  
DEFINITION Homo sapiens 5\_Ala307Thr FSHR gene for follicle stimulating hormone receptor, partial sequence.  
ACCESSION LC739719  
VERSION LC739719.1  
KEYWORDS .  
SOURCE Homo sapiens (human)  
ORGANISM [Homo sapiens](#)  
Eukaryota; Metazoa; Chordata; Craniata; Vertebrata; Euteleostomi; Mammalia; Eutheria; Euarchontoglires; Primates; Haplorrhini; Catarrhini; Hominidae; Homo.

REFERENCE 1  
AUTHORS Al-Ouqaili, M.T. and Kanaan, B.A.  
TITLE Cytogenetic screening of chromosomal abnormalities and genetic analysis of FSH receptor Ala307Thr and Ser680Asn genes in amenorrheic patients  
JOURNAL Unpublished

REFERENCE 2 (bases 1 to 507)  
AUTHORS Al-Ouqaili, M.T. and Kanaan, B.A.  
TITLE Direct Submission  
JOURNAL Submitted (18-NOV-2022) Contact: Mushtak T. Al-Ouqaili College of Medicine- University of Al-Anbar, Department of Microbiology; Al-Anbar, Al-Anbar 31001, Iraq

FEATURES  
source Location/Qualifiers  
1..507  
/organism="Homo sapiens"  
/mol\_type="genomic DNA"  
/isolate="5\_Ala307Thr"  
/db\_xref="taxon:9606"  
/country="Iraq"  
/collection\_date="2022-09-15"  
/collected\_by="Mushtak T.S. Al-Ouqaili and Bushra A. kanaan"  
[gene](#) <1..>507  
/gene="FSHR"  
[misc feature](#) <1..>507  
/gene="FSHR"  
/note="follicle stimulating hormone receptor"

ORIGIN  
1 tgatgtatgt gctatactgg atctgagatg ttgattctat ttctttttgt atttttctag  
61 ctctgagcct catccaattt gcaacaaatc tattttaagg caagaagtgg attatatgac  
121 tcaggctagg ggtcagatg cctctctggc agaagacaat gaggccagct acagcagagg  
181 atttgacatg acgtacactg agtttgacta tgacttatgc aatgaagtgg ttgacgtgac  
241 ctgctcccc aagccagatg cattcaacc atgtgaagat atcatggggg acaacatcct  
301 cagagtcctg atatggttta tcagcatcct ggccatcact gggaacatca tagtgctagt  
361 gatcctaact accagccaat ataaactcac agtccccagg ttcttatgt gcaacctggc  
421 ctttgctgat ctctgattg gaatctacct gctgctcatt gcatcagttg atatccata  
481 caagagccaa tatcacaact atgccat

//
