# Supplementary material for: Cytogenetic screening of chromosomal abnormalities and genetic analysis of FSH receptor Ala307Thr and Ser680Asn genes in amenorrheic patients
Source: PeerJ journal article supplement (doi:10.7717/peerj.15267), 2023-05-26
Supplement: LC739720.pdf [file LC739720.pdf]

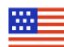

An official website of the United States government

[Here's how you know](#)[Log in](#)

Nucleotide

[GenBank](#)

## Homo sapiens 6\_Ala307Thr FSHR gene for follicle stimulating hormone receptor, partial sequence

GenBank: LC739720.1

[FASTA](#) [Graphics](#)[Go to:](#)

LOCUS LC739720 507 bp DNA linear PRI 22-NOV-2022  
 DEFINITION Homo sapiens 6\_Ala307Thr FSHR gene for follicle stimulating hormone receptor, partial sequence.

ACCESSION LC739720  
 VERSION LC739720.1

KEYWORDS .  
 SOURCE Homo sapiens (human)

ORGANISM [Homo sapiens](#)  
 Eukaryota; Metazoa; Chordata; Craniata; Vertebrata; Euteleostomi;  
 Mammalia; Eutheria; Euarchontoglires; Primates; Haplorrhini;  
 Catarrhini; Hominidae; Homo.

REFERENCE 1  
 AUTHORS Al-Ouqaili, M.T. and Kanaan, B.A.  
 TITLE Cytogenetic screening of chromosomal abnormalities and genetic analysis of FSH receptor Ala307Thr and Ser680Asn genes in amenorrheic patients

JOURNAL Unpublished  
 REFERENCE 2 (bases 1 to 507)  
 AUTHORS Al-Ouqaili, M.T. and Kanaan, B.A.  
 TITLE Direct Submission  
 JOURNAL Submitted (18-NOV-2022) Contact: Mushtak T. Al-Ouqaili College of Medicine- University of Al-Anbar, Department of Microbiology; Al-Anbar, Al-Anbar 31001, Iraq

FEATURES  
 source  
 Location/Qualifiers  
 1..507  
 /organism="Homo sapiens"  
 /mol\_type="genomic DNA"  
 /isolate="6\_Ala307Thr"  
 /db\_xref="taxon:9606"  
 /country="Iraq"  
 /collection\_date="2022-09-15"  
 /collected\_by="Mushtak T.S. Al-Ouqaili and Bushra A. kanaan"  
 /note="MBA-Ala"  
[gene](#) <1..>507  
 /gene="FSHR"  
[misc feature](#) <1..>507  
 /gene="FSHR"  
 /note="follicle stimulating hormone receptor"

ORIGIN  
 1 tgatgtatgt gctatactgg atctgagatg ttgattctat ttctttttgt atttttctag  
 61 ctctgagcct catccaattt gcaacaaatc tattttaagg caagaagttg attatatgac  
 121 tcagrctagg ggtcagatg cctctctggc agaagacaat gaggccagct acagcagagg  
 181 atttgacatg acgtacactg agtttgacta tgacttatgc aatgaagtgg ttgacgtgac  
 241 ctgctcccc aagccagatg cattcaacc atgtgaagat atcatggggg acaacatcct  
 301 cagagtcctg atatggttta tcagcatcct ggccatcact gggaacatca tagtgctagt  
 361 gatcctaact accagccaat ataaactcac agtccccagg ttcttatgt gcaacctggc  
 421 ctttgctgat ctctgattg gaatctacct gctgctcatt gcatcagttg atatccatac  
 481 caagagccaa tatcacaact atgccat

//
