# Supplementary material for: Cytogenetic screening of chromosomal abnormalities and genetic analysis of FSH receptor Ala307Thr and Ser680Asn genes in amenorrheic patients
Source: PeerJ journal article supplement (doi:10.7717/peerj.15267), 2023-05-26
Supplement: LC739725.pdf [file LC739725.pdf]

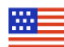

An official website of the United States government

[Here's how you know](#)[Log in](#)

Nucleotide

[GenBank](#)

## Homo sapiens 9\_Ser680Asn FSHR gene for follicle stimulating hormone receptor, partial sequence

GenBank: LC739725.1

[FASTA](#) [Graphics](#)[Go to:](#)

LOCUS LC739725 448 bp DNA linear PRI 22-NOV-2022  
 DEFINITION Homo sapiens 9\_Ser680Asn FSHR gene for follicle stimulating hormone receptor, partial sequence.

ACCESSION LC739725  
 VERSION LC739725.1

KEYWORDS .  
 SOURCE Homo sapiens (human)

ORGANISM [Homo sapiens](#)  
 Eukaryota; Metazoa; Chordata; Craniata; Vertebrata; Euteleostomi;  
 Mammalia; Eutheria; Euarchontoglires; Primates; Haplorrhini;  
 Catarrhini; Hominidae; Homo.

REFERENCE 1  
 AUTHORS Al-Ouqaili, M.T. and Kanaan, B.A.  
 TITLE Cytogenetic screening of chromosomal abnormalities and genetic analysis of FSH receptor Ala307Thr and Ser680Asn genes in amenorrheic patients

JOURNAL Unpublished  
 REFERENCE 2 (bases 1 to 448)  
 AUTHORS Al-Ouqaili, M.T. and Kanaan, B.A.  
 TITLE Direct Submission  
 JOURNAL Submitted (18-NOV-2022) Contact: Mushtak T. Al-Ouqaili College of Medicine- University of Al-Anbar, Department of Microbiology; Al-Anbar, Al-Anbar 31001, Iraq

FEATURES  
 source Location/Qualifiers  
 1..448  
 /organism="Homo sapiens"  
 /mol\_type="genomic DNA"  
 /isolate="9\_Ser680Asn"  
 /db\_xref="taxon:9606"  
 /country="Iraq"  
 /collection\_date="2022-09-15"  
 /collected\_by="Mushtak T.S. Al-Ouqaili and Bushra A. kanaan"  
 /note="MBA-Ser"  
[gene](#) <1..>448  
 /gene="FSHR"  
[misc feature](#) <1..>448  
 /gene="FSHR"  
 /note="follicle stimulating hormone receptor"

ORIGIN  
 1 cgtgtcctcc tctagtgaca ccaggatcgc caagcgcgatg gccatgtca tcttactga  
 61 cttcctctgc atggcaccca tttctttctt tgccatttct gcctccctca aggtgccctt  
 121 catcactgtg tccaaagcaa agattctgct gggtctgttt caccccatca actcctgtgc  
 181 caacccttc ctctatgcca tctttaccaaa aacttttcgc agagatttct tcattctgct  
 241 gagcaagtgt ggctgctatg aaatgcaagc ccaaatttat aggacagaaa cttcatccac  
 301 tgtccacaac acccatccaa ggaatggcca ctgctcttca gctcccagag tcaccartgg  
 361 ttccacttac atactgtgcc ctctaagtca tttagcccaa aactaaaaca caatgtgaaa  
 421 atgtatctga gtattgaatg ataattca

//
